# Supplementary material for: Study of the diffusion properties of zeolite mixtures by combined gravimetric analysis, IR spectroscopy and inversion methods (IRIS)
Source: Royal Society of Chemistry journal article supplement (doi:10.1039/d3cp01585h), 2023-01-01
Supplement: d3cp01585h1.pdf [file d3cp01585h1.pdf]

## **Supporting information**

### **Study of diffusion properties of zeolite mixtures by combined gravimetric analysis, IR spectroscopy and inversion methods (IRIS)**

Abdelhafid Ait blal,<sup>\*a</sup> Dusan Stosic,<sup>a</sup> Philippe Bazin,<sup>a</sup> Alexandre Vimont,<sup>a</sup> and Arnaud Travert<sup>\*a</sup>

<sup>a</sup> Normandie Univ, ENSICAEN, UNICAEN, CNRS, LCS, 14000 Caen, France

#### **Equation for surface barrier limitations.<sup>1</sup>**

In the analysis of relative uptake and fractional coverage curves, the conventional approach involves fitting a solution of Fick's second law for diffusion limitation (Equation 1 in the manuscript) or an exponential curve for surface barrier limitation to the experimental data (Equation 1 below):

$$\frac{m_t}{m_\infty} = 1 - \exp\left(-\alpha \frac{\Omega}{V} t\right) = 1 - \exp\left(-\tau_{surf}^{-1} t\right) \quad (1)$$

Where  $D$  and  $\alpha$  represent the intracrystalline diffusivity and surface permeability, respectively. In this analysis, the equivalent radius of a cube is assumed to be  $r = a/2$ , ensuring that the surface-to-volume ratios  $\Omega/V$  for both the cube and the sphere (equal to  $3/r$ ) are the same.<sup>1</sup>

#### **Details of the inversion numerical procedure**

This part details the procedure used to obtain the distribution functions of diffusion time constant  $\tau^{-1}$ , by using inversion methodology. In this case, 2D Infrared Inversion Spectroscopy (2D-IRIS) is based on the inversion of the infrared spectra that consist of inverting the diffusion integral equation describing by the following equation (Absorbance vs. time):

$$A(v,t) - A(v,0) = \int_0^\infty f(v,\tau^{-1}) K(t,\tau_k^{-1}) d\tau^{-1} \quad 2$$

Where  $f(\nu, \tau^{-1})$  is the distribution function of diffusion time constant, and  $K(t, \tau_i^{-1})$  is the functional dependence of the fractional uptake on time  $t$  by considering a bimodal distribution of spheres in the system, expressed as:<sup>2</sup>

$$K(t, \tau_k^{-1}) = 1 - \frac{6}{\pi^2} \sum_{n=1}^{\infty} \frac{1}{n^2} \exp\left(-\frac{n^2 \pi^2 D_e}{9 L^2} t\right) \quad 3$$

With  $\tau^{-1} = \frac{D_e}{L^2}$

To discretize **equation 2**, the  $A(\nu, t) - A(\nu, 0)$ , the functional  $K(t, \tau_k^{-1})$  and the distribution function  $f(\nu, \tau^{-1})$  are represented by matrixes which elements are given by:

$$A_{ij} = A(\nu_i, t_j) - A(\nu_i, 0) \quad i = 1, \dots, m; j = 1, \dots, n$$

$$K_{jk} = K(t_j, \tau_k^{-1}) \quad k = 1, \dots, q$$

$$f_{ki} = f(\nu_i, \tau_k^{-1})$$

The  $\tau_k^{-1}$  values are linearly spaced in the interval  $[\tau_{min}^{-1}, \tau_{max}^{-1}]$ :

$$\tau_k^{-1} = \tau_{min}^{-1} + \frac{k-1}{\Delta \tau^{-1}} \quad 4$$

With  $\Delta \tau^{-1} = \frac{\tau_{max}^{-1} - \tau_{min}^{-1}}{q-1}$

The left-hand member of the **equation 2** is approximated by numerical quadrature, which consists in approximating the integral by the weighted sum of the values of the function under integral:

$$\int_0^{\infty} q(t_j, \tau_k^{-1}) (\nu, \tau^{-1}) d\tau^{-1} \approx \sum_{k=1}^q w_k q_{jk} f_{ki} \quad 5$$

The weighting coefficients  $w_k$  are determined by the following expression:

$$w_k = \begin{cases} \Delta\tau^{-1}, & 2 \leq k \leq q-1 \\ \frac{\Delta\tau^{-1}}{2}, & k = 1, q \end{cases} \quad 6$$

Discretization of **equation 2**, thus the results in the following system of linear algebraic equations:

$$A_{ij} = \sum_{k=1}^q w_k q_{jk} f_{ki} \quad i = 1, \dots, m; j = 1, \dots, n \text{ and } k = 1, \dots, q \quad 7$$

Denoting:

$$\Theta_{jk} = w_k q_{jk} \quad 8$$

The following matrix equation is obtained:

$$A = \Theta f \quad 9$$

Denoting  $A_i$  and  $f_i$  the vectors of absorbance values  $A_{ij}$  and distribution function values  $f_{ki}$  at the wavenumber  $\nu_i$ , this linear system could be solved with respect to  $f$  by minimizing the residuals using a least-squares method, i.e. by minimizing:

$$\Phi_{LS}(f) = \sum_i \|\Theta f_i - A_i\|^2 = \sum_i (\Theta f_i - A_i)^T (\Theta f_i - A_i) \quad 10$$

However, because of the smoothness of the kernel  $\Theta$ , which varies slowly with  $\tau_k^{-1}$ , this is a numerically ill-posed problem:<sup>3</sup> the small experimental errors in  $A(\nu, t)$  can lead to large changes in the optimum solutions  $f$ . This problem is solved using a classical procedure known as Tikhonov regularization<sup>4</sup> which consisting of enforcing the smoothness of the solution by adding a weighted constraint  $\lambda^S$  to the objective function to be minimized, where  $\lambda$  is the regularization parameter and  $S$  a measure of the smoothness of the distribution function. However, the solution function  $f(\nu, \tau^{-1})$  is that which minimize the functional:

$$\Phi_{reg}[f] = \Phi_{LS}[f] + \lambda S[f] \quad 11$$

Where  $\Phi_{LS}[f]$  is the sum of squared residuals and  $\lambda S[f]$  is the penalty function where  $\lambda$  is the regularization parameter ( $\lambda \geq 0$ ) which controls the level of smoothing to be applied and  $S[f]$  is a measure of the smoothness of  $f$ . The  $S[f]$  is the norm of the second derivative of  $f$  with respect to  $\tau^{-1}$  was calculated by the numerical quadrature:

$$S[f] = \left\| \frac{\partial^2 f}{\partial \tau^{-12}} \right\|^2 \approx \sum_i \sum_{k=1}^q (f_{(k-1)i} - 2f_{ki} + f_{(k+1)i})^2 \frac{\Delta \tau^{-1}}{(\Delta \tau^{-1})^4} \quad 12$$

Where  $f_{(-1)i} = f_{0i} = f_{qi} = f_{(q+1)i} = 0$ . This choice enforces the solution to be smoothed towards zero values at  $\tau_{max}^{-1}$  and  $\tau_{min}^{-1}$  which is appropriate for a distribution function. However, with this choice, the **equation 12** can be expressed as a matrix equation:

$$S[f] = \sum_i f_i^T S f_i \quad 13$$

Where  $S$  is a symmetric matrix defined by:

$$S = \frac{1}{(\Delta \tau^{-1})^3} \begin{pmatrix} 6 & -4 & 1 & 0 & \dots & 0 & 0 \\ -4 & 6 & -4 & -1 & \dots & 0 & 0 \\ 1 & -4 & 6 & -4 & \dots & 0 & 0 \\ 0 & 1 & -4 & 6 & \dots & 0 & 0 \\ \vdots & \vdots & \vdots & \vdots & \ddots & 0 & 0 \\ 0 & 0 & 0 & 0 & \dots & 6 & -4 \\ 0 & 0 & 0 & 0 & \dots & -4 & 6 \end{pmatrix}$$

By using **equation (10)** and **(13)**, the **equation (11)** can be will be written:

$$\Phi_{reg}[f] = \sum_i (\theta f_i - A_i)^T (\theta f_i - A_i) + \lambda f_i^T S f_i \quad 14$$

After the expansion of and dropping the constant term, the problem of minimizing  $\Phi_{reg}[f]$  amounts to solve the quadratic programming (QP) problems:

$$\Phi_{reg}[f] = f_i^T (\Theta^T \Theta + \lambda S) f_i - 2A_i^T \Theta f_i \quad 15$$

With the non-negativity constraint, which can be solved by most of the numerical computational packages under its standard form, i.e. minimize:

$$\Phi_{reg}[f] = \frac{1}{2} f_i^T Q f_i + c^T f_i \quad 16$$

With  $Q = 2\Theta^T \Theta + 2\lambda S$  and  $c^T = -2A_i^T \Theta$  subject to the constraint  $f_i \geq 0$ .

For the present study, the numerical calculations were carried out with Python, especially Spectrochempy library,<sup>5</sup> using the quadprog routine to solve the quadratic programming problem (**Equation 16**).<sup>6</sup>

**Complementary of the results of the paper:**

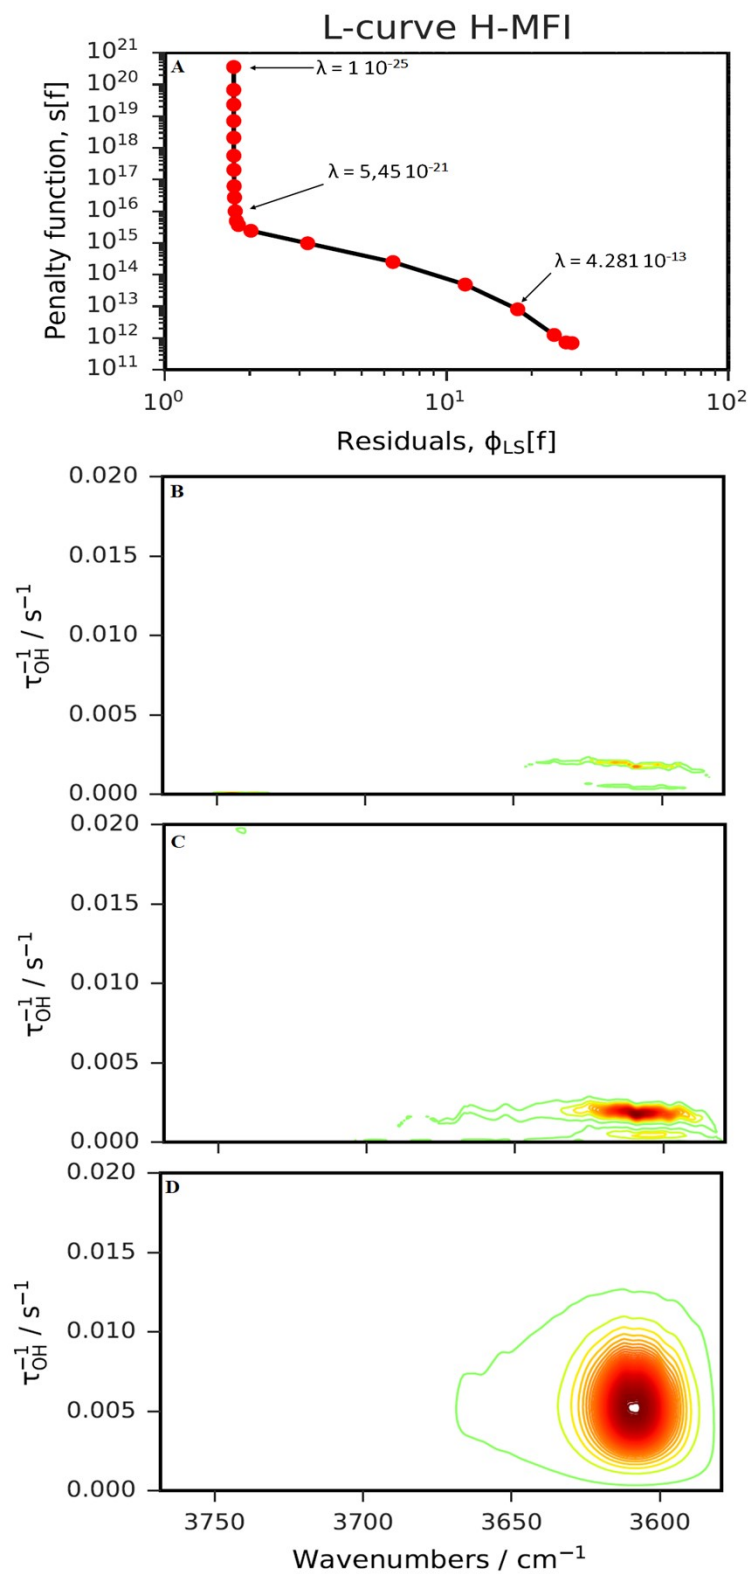

**Figure S 1.** (A): L-curve plot for determining the optimum choice of regularization parameter  $\lambda$ , (B, C and D): 2D distribution function  $f(v, \tau^{-1})$  obtained by inversion spectroscopy for  $\lambda = 1 \cdot 10^{-25}$  (B),  $\lambda = 5,45 \cdot 10^{-21}$  (C), and  $\lambda = 4,281 \cdot 10^{-13}$  (D).

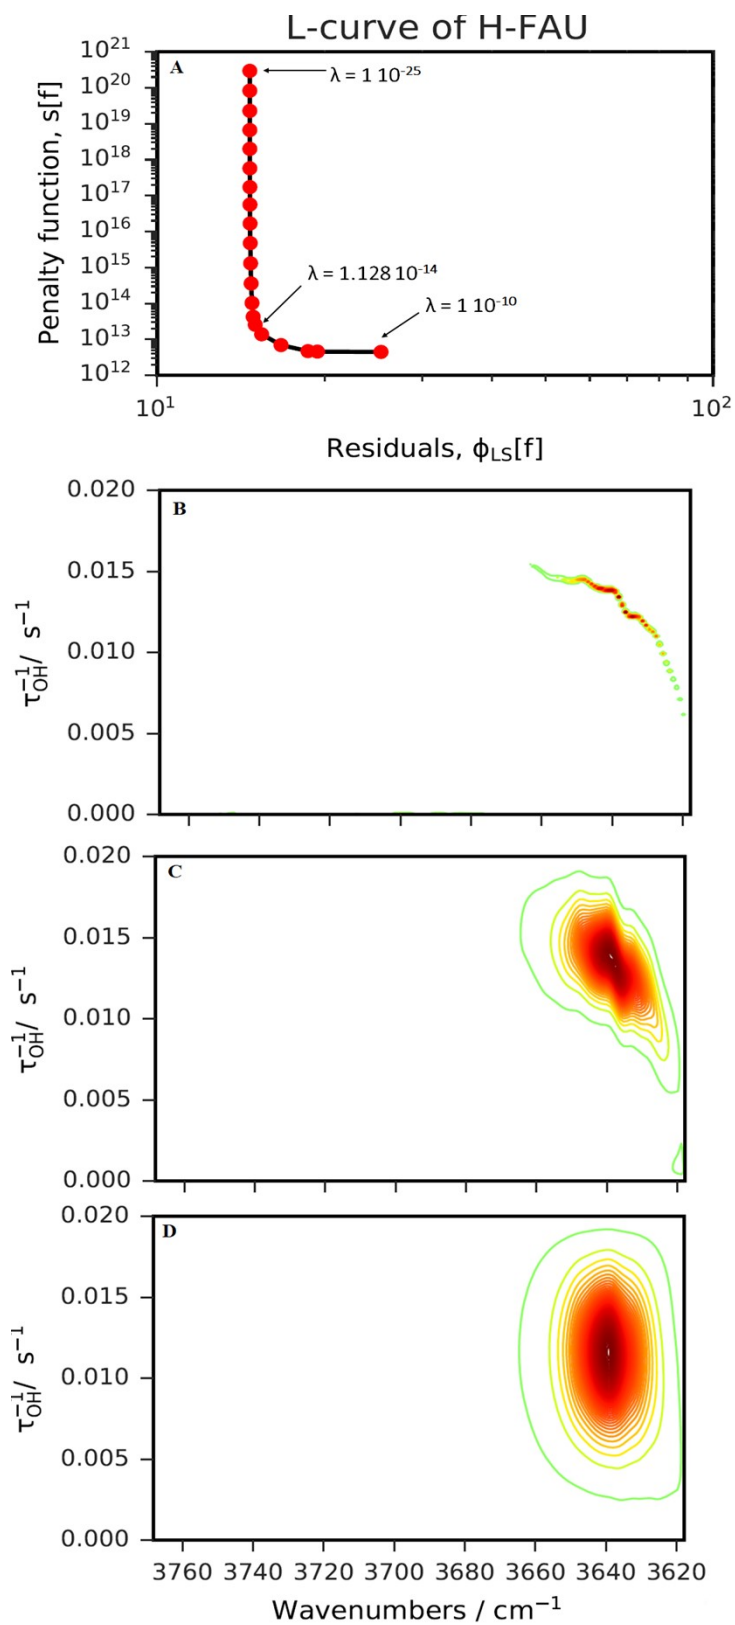

**Figure S2. (A):** L-curve plot for determining the optimum choice of regularization parameter  $\lambda$ , (B, C and D): 2D distribution function  $f(v, \tau^{-1})$  obtained by inversion spectroscopy for  $\lambda = 1 \cdot 10^{-25}$  (B),  $\lambda = 1.128 \cdot 10^{-14}$  (C), and  $\lambda = 1 \cdot 10^{-10}$  (D).

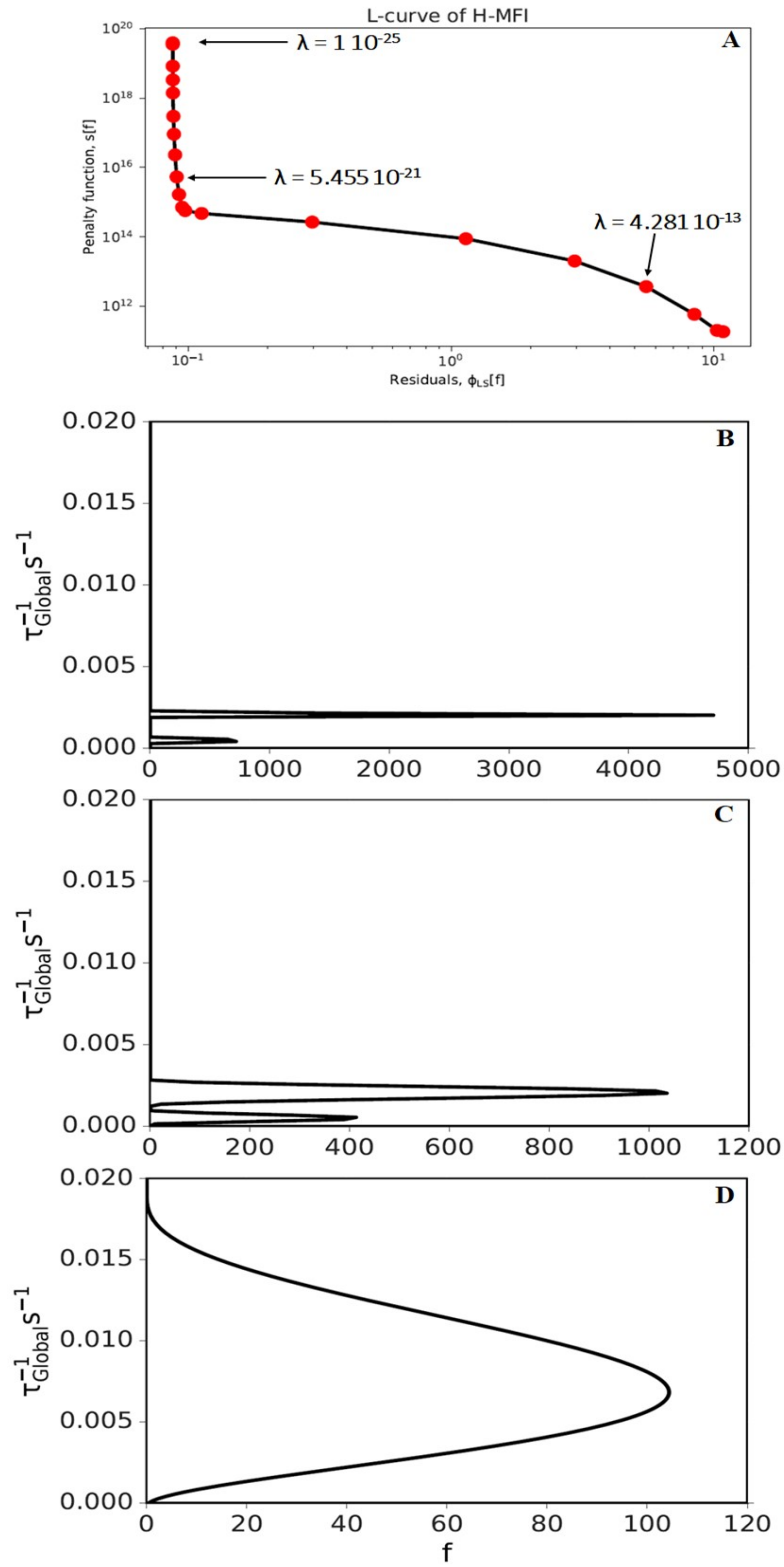

**Figure S3.** L-curve plot for determining the optimum choice of regularization parameter  $\lambda$ , (B, C and D): 1D distribution function  $f(v)$  obtained by inversion gravimetric uptake for  $\lambda = 1 \cdot 10^{-25}$  (B),  $\lambda = 5.455 \cdot 10^{-21}$  (C), and  $\lambda = 4.281 \cdot 10^{-13}$  (D).

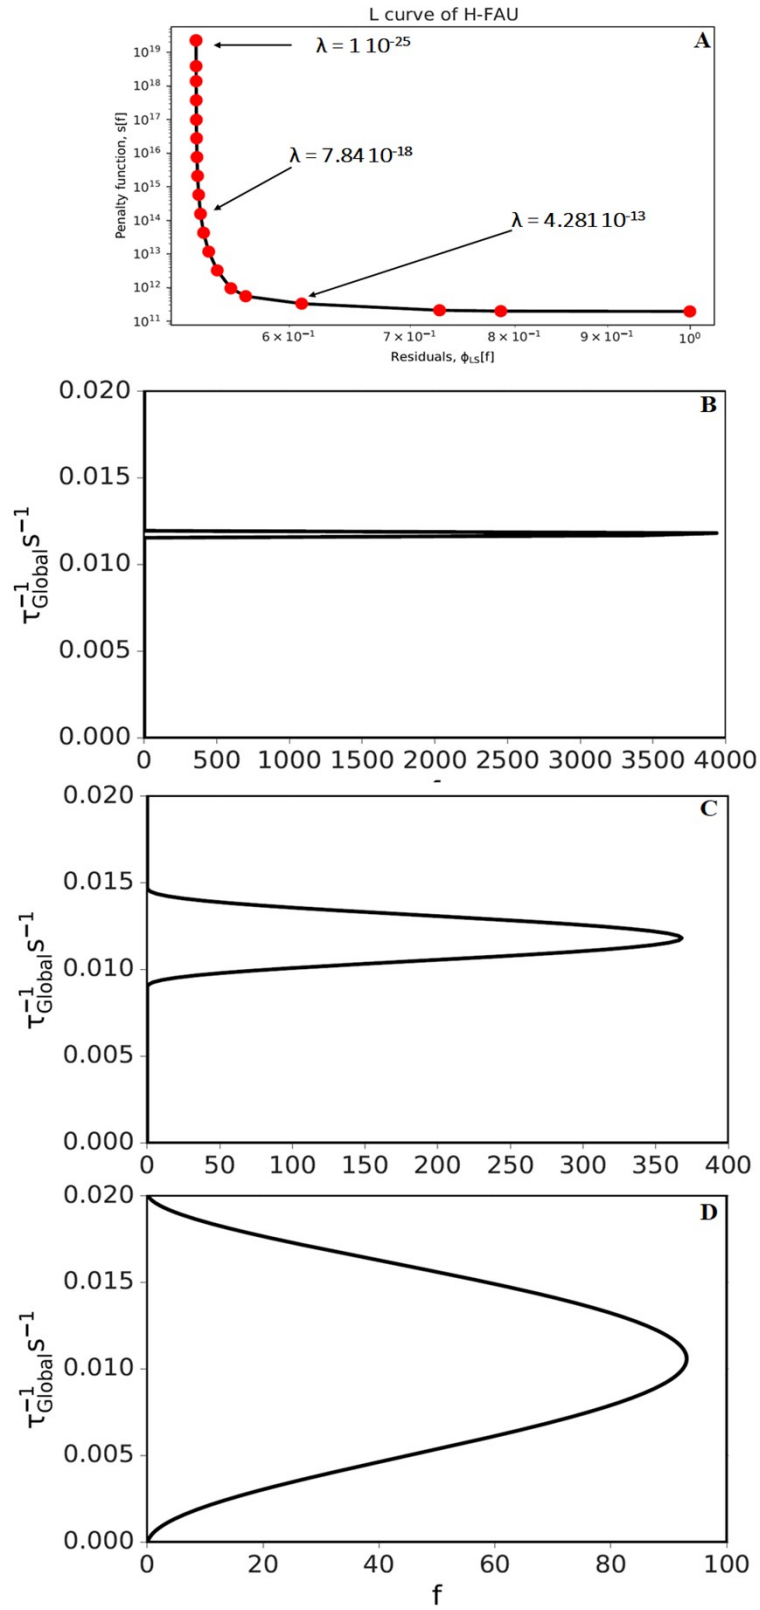

**Figure S4.** (A): L-curve plot for determining the optimum choice of regularization parameter  $\lambda$ , (B, C and D): 1D distribution function  $f(v)$  obtained by inversion gravimetric uptake for  $\lambda = 1 \cdot 10^{-25}$  (B),  $\lambda = 7.84 \cdot 10^{-18}$  (C), and  $\lambda = 4.281 \cdot 10^{-13}$  (D).

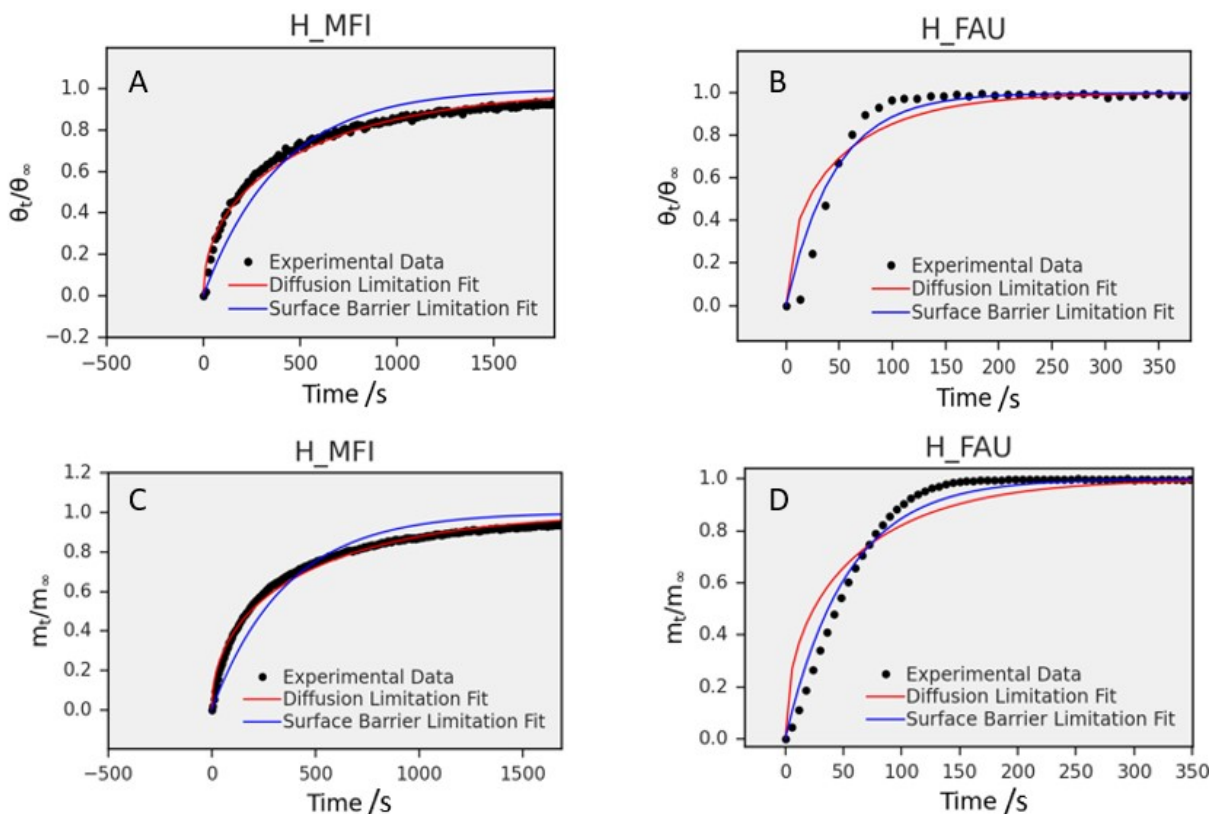

**Figure S5.** (A and C): Fractional coverage (black points) and relative uptake (black points) of H-MFI obtained by IR and gravimetric measurement, respectively, (B and D): Fractional coverage (black points) and relative uptake (black points) of H-FAU obtained by the same methods. The red and blue curves represent the fits of the diffusion-limited and surface-barrier-limited analytical expressions, respectively.

#### References:

1. Remi, J. C. S. *et al.* The role of crystal diversity in understanding mass transfer in nanoporous materials. *Nat. Mater.* **15**, 401–406 (2016).
2. Ruthven, D. M., Kärger, J. & Theodorou, D. N. *Diffusion in nanoporous materials*. (John Wiley & Sons, 2012).
3. Mroczka, J. & Szczuczyński, D. Inverse problems formulated in terms of first-kind Fredholm integral equations in indirect measurements. *Metrol Meas Syst* **16**, 333–357 (2009).
4. Tikhonov, A. N. On the stability of inverse problems. in *Dokl. Akad. Nauk SSSR* vol. 39 195–198 (1943).
5. Travert, A. & Fernandez, C. SpectroChemPy. (2023) doi:10.5281/zenodo.7759231.
6. Quadratic programming in Python. <https://scaron.info/blog/quadratic-programming-in-python.html>.
